# Supplementary material for: A hierarchical hollow-on-hollow NiCoP electrocatalyst for efficient hydrogen evolution reaction
Source: Royal Society of Chemistry journal article supplement (doi:10.1039/c9cc08256e), 2019-11-25
Supplement: c9cc08256e1.pdf [file c9cc08256e1.pdf]

# **Hierarchical Hollow-on-hollow NiCoP Electrocatalyst for Efficient Hydrogen Evolution Reaction**

## **Supporting Information**

*Juntao Zhang <sup>a,b</sup>, Lipeng Zhang <sup>a,b</sup>, Xingdong Wang <sup>a,b</sup>, Wei Zhu <sup>a,b,\*</sup>, Zhongbin Zhuang <sup>a,b,c\*</sup>*

*<sup>a</sup> State Key Lab of Organic-Inorganic Composites, Beijing University of Chemical Technology, Beijing 100029, China.*

*<sup>b</sup> Beijing Advanced Innovation Center for Soft Matter Science and Engineering, Beijing University of Chemical Technology, Beijing 100029, China.*

*<sup>c</sup> Beijing Key Laboratory of Energy Environmental Catalysis, Beijing University of Chemical Technology, Beijing 100029, China.*

## Experimental Section

### Chemicals.

Cobaltous nitrate hexahydrate ( $\text{Co}(\text{NO}_3)_2 \cdot 6\text{H}_2\text{O}$ ; A.R.; Sinopharm Chemical Reagent Co., Ltd., China), nickel(II) nitrate hexahydrate ( $\text{Ni}(\text{NO}_3)_2 \cdot 6\text{H}_2\text{O}$ ; A.R.; Sinopharm Chemical Reagent Co., Ltd., China), 2-methylimidazole ( $\text{C}_4\text{H}_6\text{N}_2$ ; A.R.; Sinopharm Chemical Reagent Co., Ltd., China), methanol ( $\text{CH}_3\text{OH}$ ; A.R.; Beijing Chemical Reagent Factory, China), ethanol ( $\text{C}_2\text{H}_5\text{OH}$ ; A.R.; Beijing Chemical Reagent Factory, China), sulfuric acid ( $\text{H}_2\text{SO}_4$ ; A.R.; Beijing Chemical Reagent Factory, China), platinum on carbon black (20 wt.% Pt/C; HISPEC-3000; Alfa Aesar), sodium hypophosphite ( $\text{NaH}_2\text{PO}_2$ ; 99.0%; Aladdin). All chemical reagents were used without any further purification. Deionized water (18.2  $\text{M}\Omega \cdot \text{cm}$  resistivity) was used for all the electrochemical experiments.

### Synthetic Methods.

*Synthesis of ZIF-67.* In a typical synthesis of ZIF-67, 3.28 g of 2-methylimidazole and 2.9 g of  $\text{Co}(\text{NO}_3)_2 \cdot 6\text{H}_2\text{O}$  was dissolved in 100 mL of methanol, respectively. Then, the  $\text{Co}(\text{NO}_3)_2 \cdot 6\text{H}_2\text{O}$  methanol solution was poured into the 2-methylimidazole solution, and the solution was stirred for 12 h. The product was collected by centrifugation and washed by methanol for three times.

*Synthesis of ZIF-67@NiCo-LDH.* 40 mg of ZIF-67 was dispersed in 20 mL of ethanol, and 90 mg of  $\text{Ni}(\text{NO}_3)_2 \cdot 6\text{H}_2\text{O}$  was dissolved in 5 mL of ethanol. Then, the ZIF-67 dispersion was added into the  $\text{Ni}(\text{NO}_3)_2 \cdot 6\text{H}_2\text{O}$  solution, and the solution was stirred for different times. Finally, the product was collected by centrifugation, and washed by methanol for three times.

*Synthesis of NiCo.* The NiCo was obtained by the high-temperature pyrolysis of ZIF-67@NiCo-LDH at 900 °C for 2 h with a heating rate of 5 °C·min<sup>-1</sup>. The pyrolysis was conducted in a tubular furnace equipped with a programmed temperature controller by using  $\text{N}_2$  as the protective atmosphere.

*Synthesis of HiHo-NiCoP.* The as-obtained NiCo (about 10 mg) and  $\text{NaH}_2\text{PO}_2$  (1 g) were placed in two separated porcelain boats in the tubular furnace, and the NiCo was placed at the upstream. Then the quartz tube was heated up to 300 °C with a heating rate of 5 °C·min<sup>-1</sup>.  $\text{N}_2$  was used as the protective atmosphere in the phosphidation.

*Synthesis of NiCo-ZIF-67.* The synthesis method for NiCo-ZIF-67 was the same as that of ZIF-67 except adding 0.144 g of  $\text{Ni}(\text{NO}_3)_2 \cdot 6\text{H}_2\text{O}$  into the  $\text{Co}(\text{NO}_3)_2$  solution.

*Synthesis of NiCoP NPs.* 40 mg of NiCo-ZIF-67 and 1 g of  $\text{NaH}_2\text{PO}_2$  were placed at two separate positions in a tubular furnace, and  $\text{NaH}_2\text{PO}_2$  was at the upstream. Then the tubular furnace was heated up to 300 °C for 2 h with a heat rate of 5 °C min<sup>-1</sup> in  $\text{N}_2$  atmosphere (>99.999%).

*Synthesis of H1-NiCoP.* The synthesis method for H1-NiCoP was the same as NiCoP NPs except using ZIF-67@NiCo-LDH as the precursor for the phosphidation.

*Synthesis of H2-NiCoP.* H2-NiCoP was obtained by the pyrolysis and phosphidation of NiCo-ZIF-67 under the same conditions as the synthesis of HiHo-NiCoP.

*Synthesis of CoP.* The synthesis method for CoP was the same as HiHo-NiCoP except using ZIF-67 as the precursor.

*Synthesis of NiP.* The NiP NPs were prepared by a modified phosphidation method.<sup>[S1]</sup> 30 mg of  $\text{Ni}(\text{NO}_3)_2 \cdot 6\text{H}_2\text{O}$  powder and 1 g of  $\text{NaH}_2\text{PO}_2$  were placed in two separated porcelain boats in the tubular furnace, and  $\text{Ni}(\text{NO}_3)_2 \cdot 6\text{H}_2\text{O}$  was placed at the upstream. Then the quartz tube was heated up to 300 °C with a heating rate of 5 °C·min<sup>-1</sup>.  $\text{N}_2$  was used as the protective atmosphere in the phosphidation.

## Characterizations

XRD measurements were performed on a Bruker D8 diffractometer with Cu K $\alpha$  radiation ( $\lambda=0.15406$  nm). TEM characterization was conducted on an FEI Tecnai G2 20m microscope at accelerating voltage of 200 kV. TEM samples were prepared by drop-casting the sample suspensions onto the copper grids with carbon films. HRTEM, EDS, and HAADF-STEM were performed on a JEOL JEM-2010F microscope with an accelerating voltage of 200 kV. XPS was conducted on the Thermo Fisher ESCALAB 250Xi analyzer with a monochromatic Al K $\alpha$  as the X-ray source.

## Electrochemical Test

2.0 mg of the NiCoP catalysts were dispersed in a mixed solution consisted of 380  $\mu\text{L}$  of  $\text{H}_2\text{O}$ , 100  $\mu\text{L}$  of ethanol and 20  $\mu\text{L}$  of 5 wt % Nafion. The suspensions were ultrasonicated for 1 h to prepare homogeneous ink solutions. Then 20  $\mu\text{L}$  of the ink solution was dropwise added onto a glassy carbon

electrode ( $d=5$  mm), resulting a mass loading of  $0.41 \text{ mg cm}^{-2}$  on the working electrode. The electrochemical measurements were conducted with an electrochemical workstation (CHI 660E) by using the typical three-electrode configuration, where a graphite rod was used as the counter electrode and a saturated calomel electrode (SCE) was used as the reference electrode. All the electrochemical measurements were tested in  $\text{H}_2$ -saturated  $0.5\text{M H}_2\text{SO}_4$  electrolyte. All the potentials in the text were referred to the reversible hydrogen electrode (RHE). The zero point of RHE was calibrated using the equilibrium potential of HOR/HER of Pt/C catalyst in  $\text{H}_2$ -saturated  $\text{H}_2\text{SO}_4$  electrolyte.  $iR$  compensation was employed to correct  $iR$ -drop for the HER polarization curves.

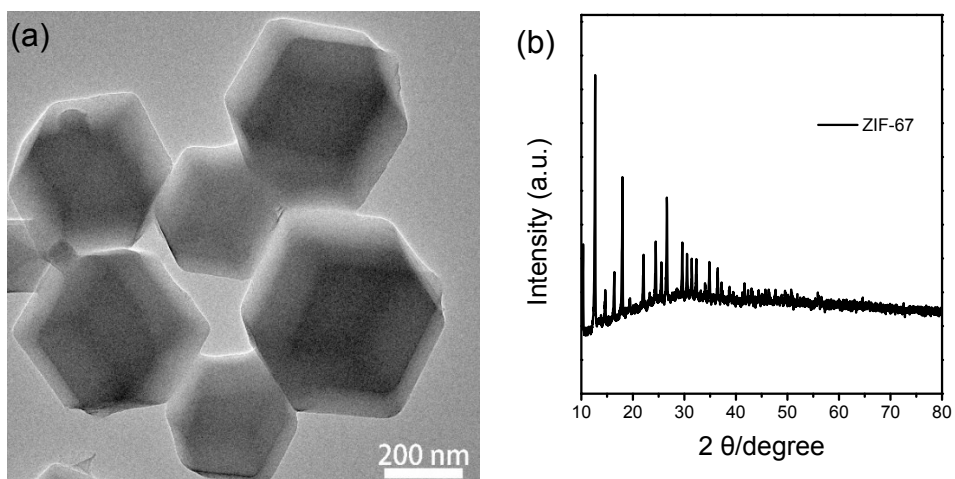

**Figure S1** (a) TEM image and (b) XRD pattern of ZIF-67

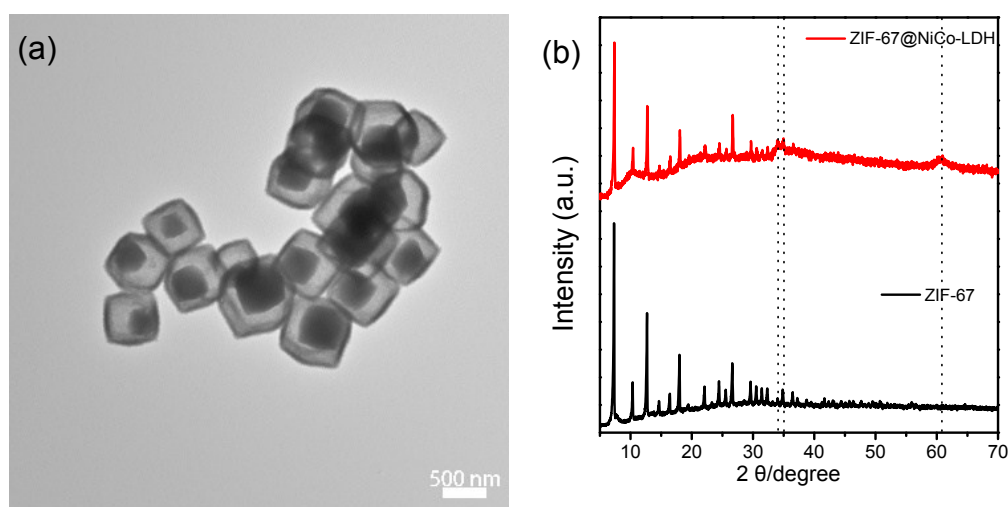

**Figure S2** (a) TEM image and (b) XRD pattern of ZIF-67@NiCo-LDH. The TEM image of the product in Fig. S2a shows that the solid polyhedrons convert into yolk-shell structures of a larger size. Broad diffraction peaks at 10.51, 34.51, and 60.51 newly formed in the XRD pattern of the yolk-shell structures, as shown in Fig. S2b. These peaks were ascribed to the formation of NiCo layered double hydroxide shell structures (denoted as NiCo-LDH, I in Scheme 1) according to the reports regarding the synthesis of Ni-Co MOF derivatives.

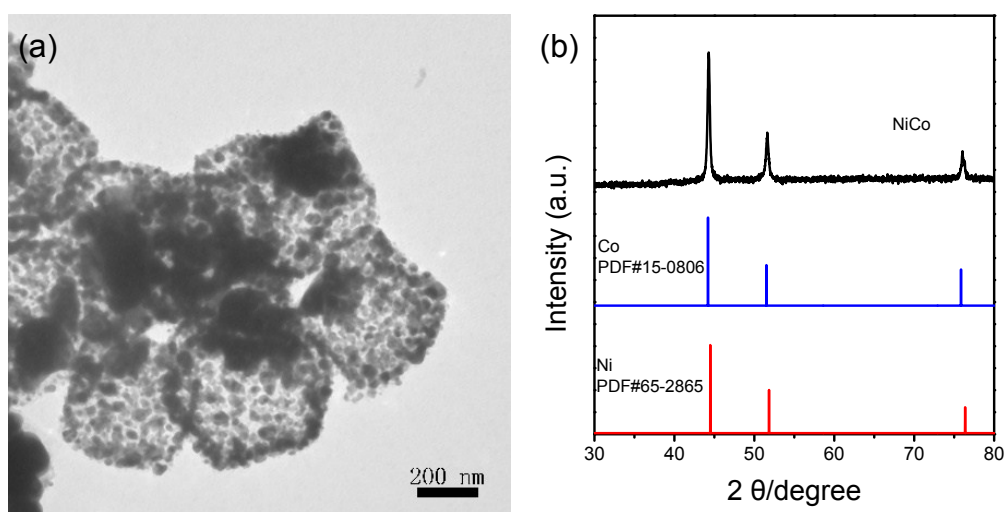

**Figure S3** (a) TEM image and (b) XRD pattern of NiCo. The TEM image in Fig. S3a shows that hollow NiCo structures were assembled by many cross-linked NPs. The XRD pattern in Fig. S3b demonstrated that the NiCo NPs were in metallic status. In other words, both  $\text{Ni}^{2+}$  and  $\text{Co}^{2+}$  were reduced back to metals by the HMIM ligands during the high-temperature pyrolysis step.

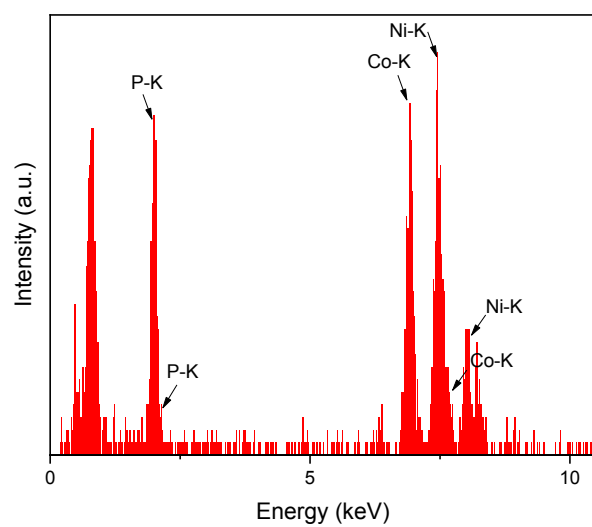

**Figure S4** the EDS spectrum of the HiHo-NiCoP



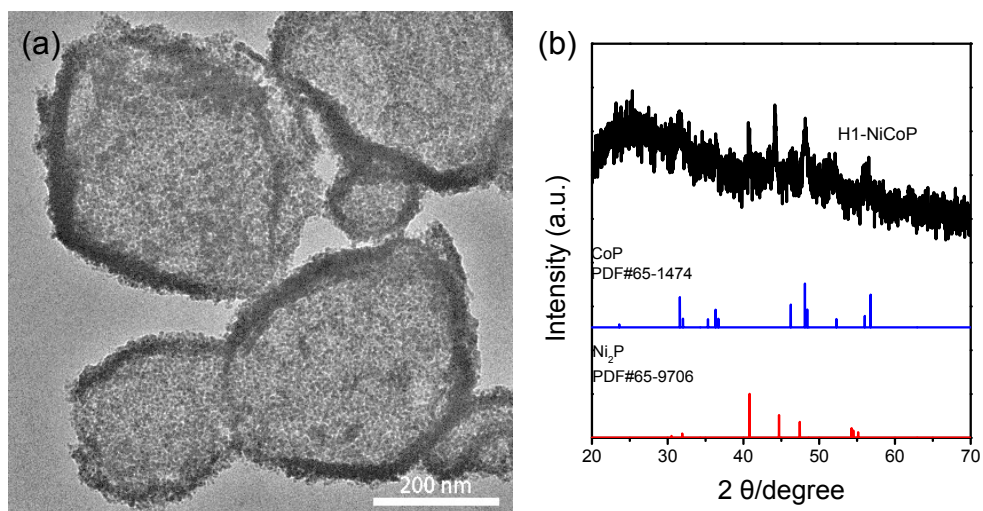

**Figure S5** (a) TEM image and (b) XRD pattern of H1-NiCoP

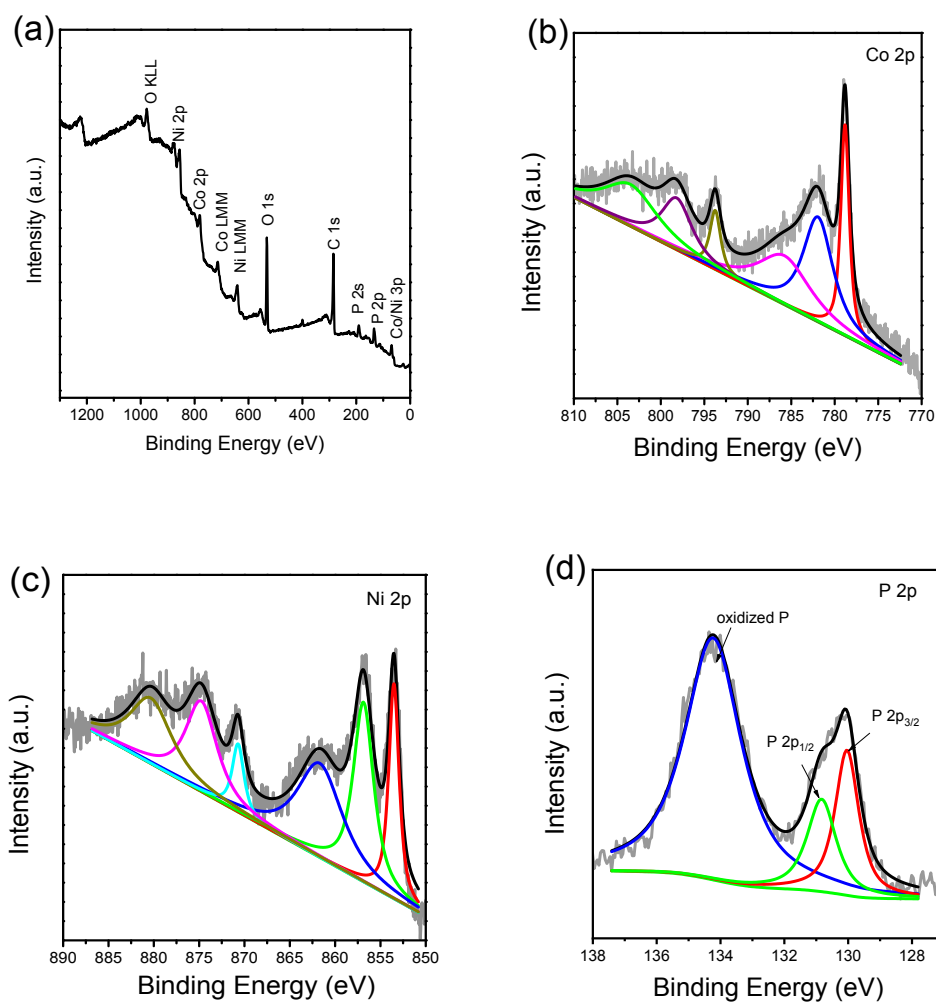

**Figure S6** XPS spectra of HiHo-NiCoP: (a) survey scan, (b) Co 2p spectrum, (c) Ni 2p spectrum, (d) P 2p spectrum. The survey spectrum confirmed that the HiHo-NiCoP consisted of Co, Ni, P, C, N, and O on the surface (Fig. S6a). Phosphide took up 20.1% of the phosphorus species. XPS results confirmed the formation of metal phosphides on the surface, which is active for the HER.

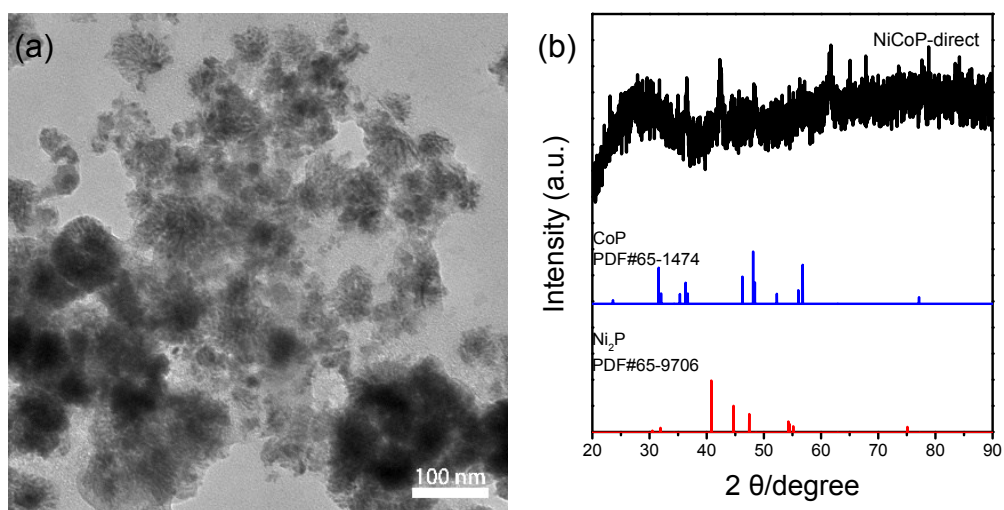

**Figure S7** (a) TEM image and (b) XRD pattern of NiCoP nanoparticles

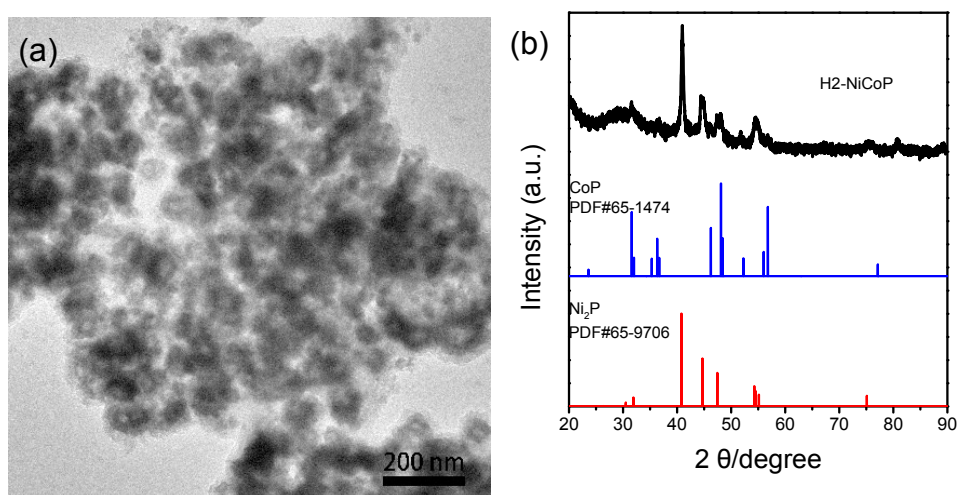

**Figure S8** (a) TEM image and (b) XRD pattern of H2-NiCoP

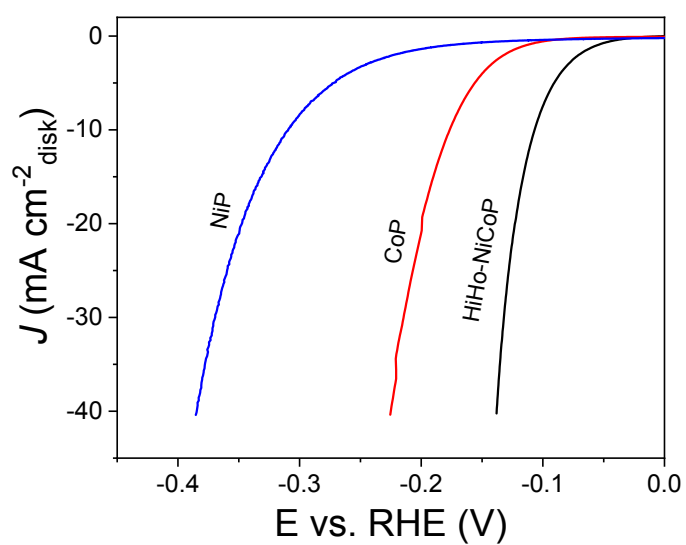

**Figure S9** the HER polarization curves of the monometallic phosphide NPs obtained in 0.5 M  $\text{H}_2\text{SO}_4$  with a scan rate of  $5 \text{ mV s}^{-1}$ .

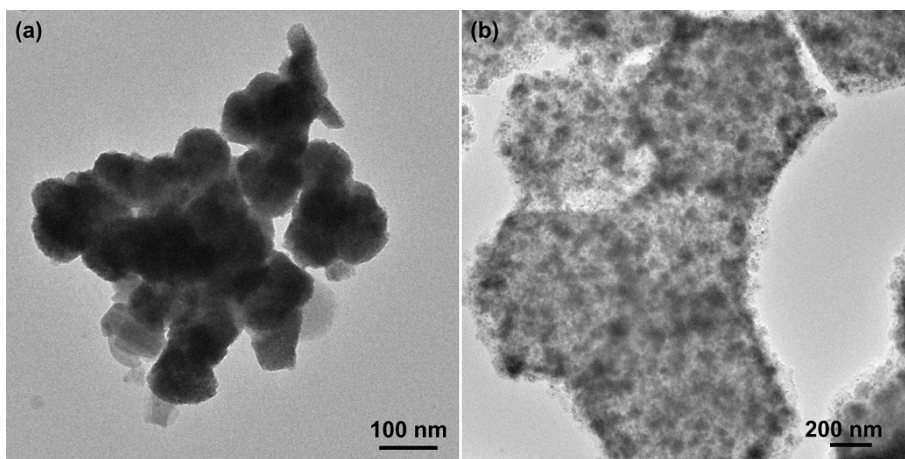

**Figure S10** TEM images of (a) NiP NPs and (b) CoP NPs.

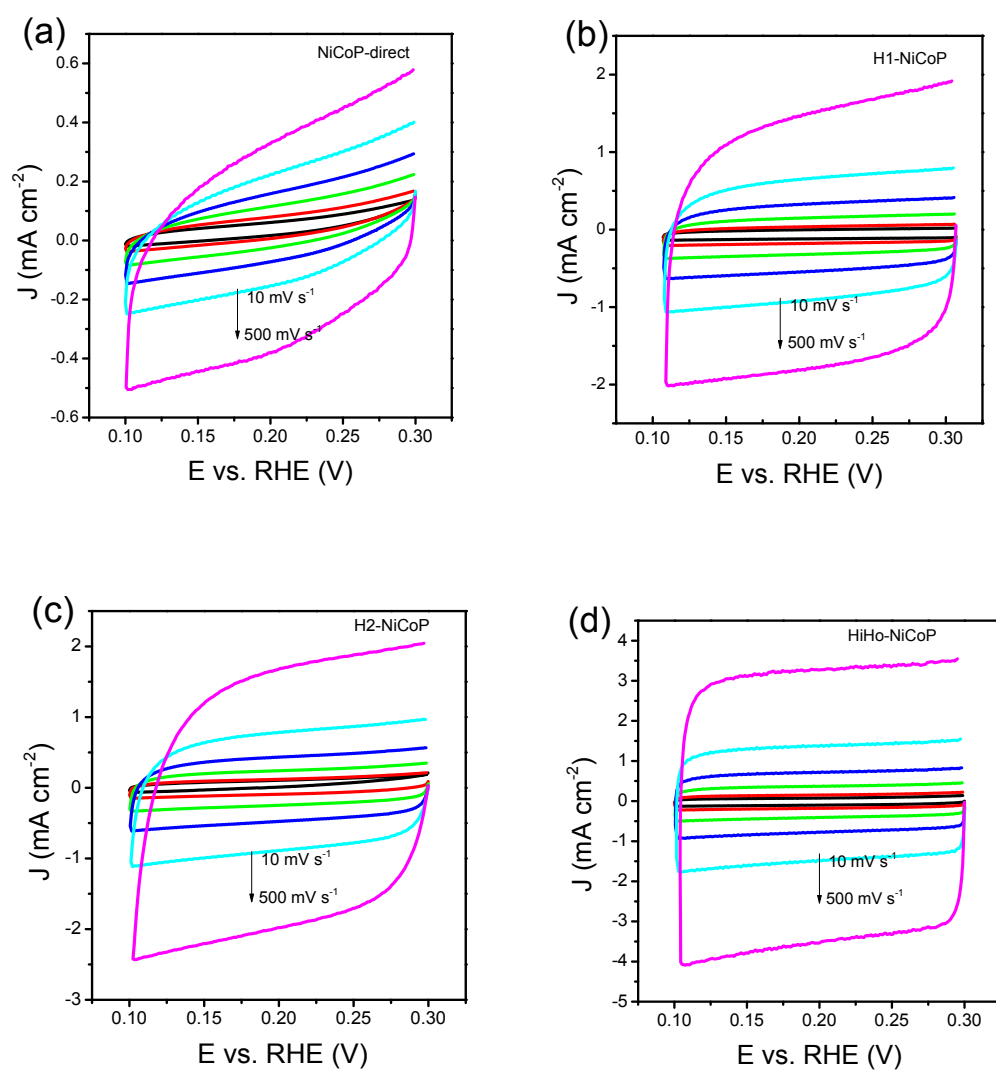

**Figure S11** The polarization curves in the non-faradic region at different sweep rates: (a) NiCoP nanoparticle (solid), (b) H1-NiCoP, (c) H2-NiCoP, and (d) HiHo-NiCoP.

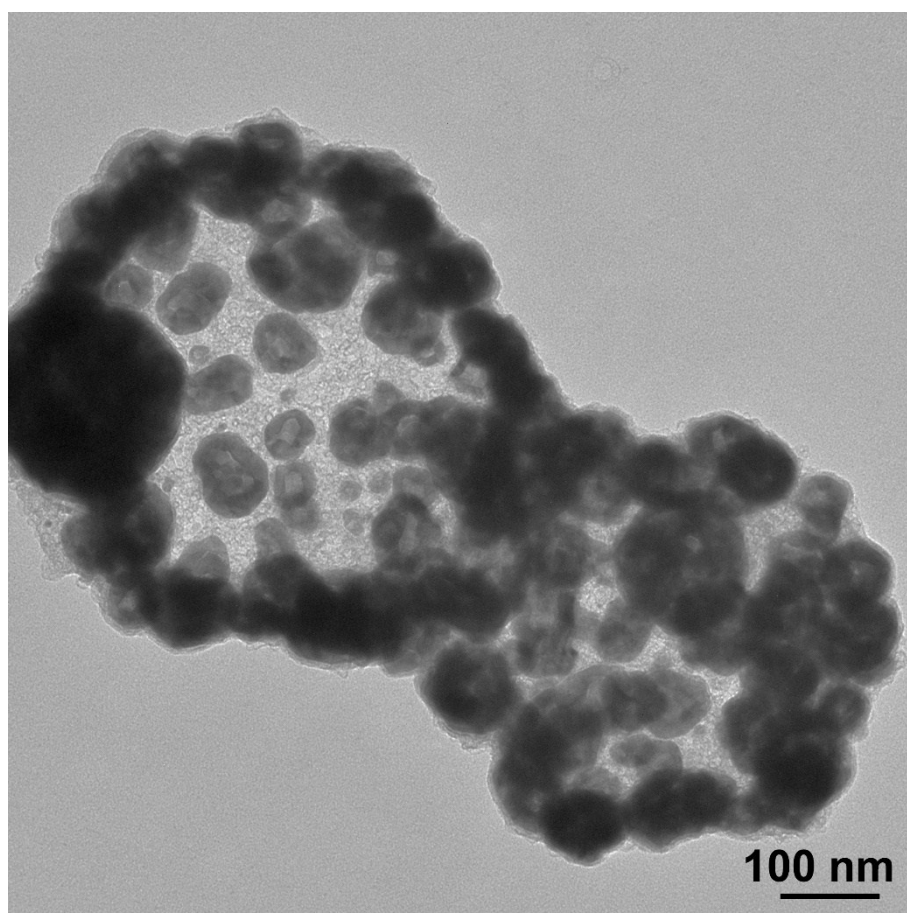

**Figure S12** TEM image of the HiHo-NiCoP after the durability test.



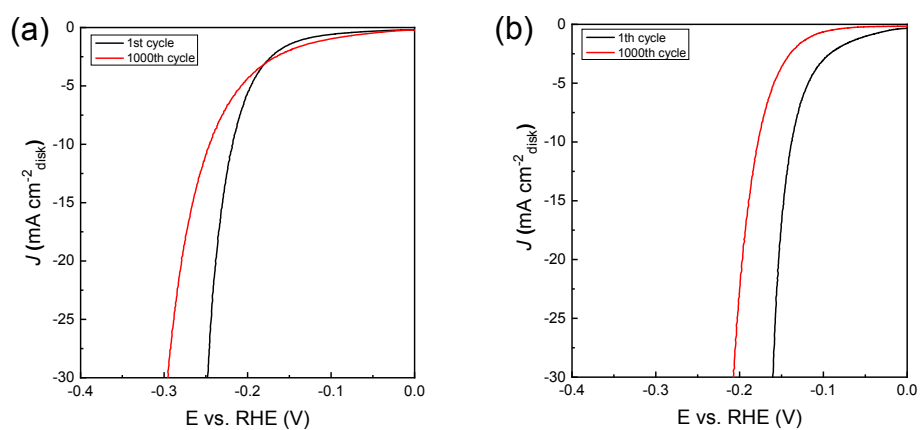

**Figure S13** The HER polarization curves of (1) H1-NiCoP and (2) H2-NiCoP catalysts before and after ADT, i.e., 1000 cycles' CV scans between 0 and -0.2 V at a sweep rate of 50 mV·s<sup>-1</sup>.

**Table S1** Summary of the catalytic performance of the reported NiCoP electrocatalysts toward HER in 0.5 M H<sub>2</sub>SO<sub>4</sub> electrolyte.

| Catalysts                                  | Ni:Co:P<br>(atomic) | Loading<br>(mg·cm <sup>-2</sup> ) | $\eta_{10}$<br>(mV) | Tafel<br>Slope<br>(mV·dec <sup>-1</sup> ) | Stability                                          | Ref.      |
|--------------------------------------------|---------------------|-----------------------------------|---------------------|-------------------------------------------|----------------------------------------------------|-----------|
| Co <sub>1.6</sub> Ni <sub>0.4</sub> P/CNTs | 16:48:36            | 0.2                               | 165                 | 47                                        | $\eta_{10}$ increased 13 mV after 1000 cycles' ADT | [S2]      |
| Ni-Co <sub>2</sub> P/NCNTs                 | 11:55:34            | 0.2                               | 230                 | 105                                       | $\eta_{10}$ unchanged after 1000 cycles' ADT       | [S3]      |
| Ni <sub>2</sub> P/NiCoP@NCCs               | 32:18:50            | 0.5                               | 120                 | 90                                        | $\eta_{10}$ unchanged after 1000 cycles' ADT       | [S4]      |
| NiCoP/NF                                   | NA                  | 5.6                               | 118                 | 68                                        | $\eta_{10}$ unchanged after 1000 cycles' ADT       | [S5]      |
| Ni-Co-P/C60                                | NA                  | 0.35                              | 97                  | 48                                        | $\eta_{10}$ increased 13 mV after 1000 cycles' ADT | [S6]      |
| Co <sub>1</sub> Ni <sub>1</sub> -P@C       | Ni:Co=1:1           | 0.5                               | 169                 | 73                                        | $\eta_{10}$ increased 25 mV after 5000 cycles' ADT | [S7]      |
| HiHo-NiCoP                                 | 33:31:36            | 0.41                              | 103                 | 52                                        | $\eta_{10}$ unchanged after 5000 cycles' ADT       | This work |

**Reference:**

- [S1] L. Feng, H. Vrubel, M. Bensimon, X. Hu, Easily-prepared dinickel phosphide (Ni<sub>2</sub>P) nanoparticles as an efficient and robust electrocatalyst for hydrogen evolution, *Phys. Chem. Chem. Phys.*, 16 (2014) 5917-5921.
- [S2] Y. Pan, Y. Chen, Y. Lin, P. Cui, K. Sun, Y. Liu, C. Liu, Cobalt nickel phosphide nanoparticles decorated carbon nanotubes as advanced hybrid catalysts for hydrogen evolution, *Journal of Materials Chemistry A*, 4 (2016) 14675-14686.
- [S3] Y. Pan, Y. Liu, Y. Lin, C. Liu, Metal Doping Effect of the M-Co<sub>2</sub>P/Nitrogen-Doped Carbon Nanotubes (M = Fe, Ni, Cu) Hydrogen Evolution Hybrid Catalysts, *ACS Applied Materials & Interfaces*, 8 (2016) 13890-13901.
- [S4] L. Han, T.W. Yu, W. Lei, W.W. Liu, K. Feng, Y.L. Ding, G.P. Jiang, P. Xu, Z.W. Chen, Nitrogen-doped carbon nanocones encapsulating with nickel-cobalt mixed phosphides for enhanced hydrogen evolution reaction, *Journal of Materials Chemistry A*, 5 (2017) 16568-16572.
- [S5] T. Liu, X.Y. Yan, P.X. Xi, J. Chen, D.D. Qin, D.L. Shan, S. Devaramani, X.Q. Lu, Nickel-Cobalt phosphide nanowires supported on Ni foam as a highly efficient catalyst for electrochemical hydrogen evolution reaction, *International Journal of Hydrogen Energy*, 42 (2017) 14124-14132.
- [S6] Z.L. Du, N. Jannatun, D.Y. Yu, J. Ren, W.H. Huang, X. Lu, C-60-Decorated nickel-cobalt phosphide as an efficient and robust electrocatalyst for hydrogen evolution reaction, *Nanoscale*, 10 (2018) 23070-23079.
- [S7] H.G. Liang, C. Yang, S. Ji, N.Y. Jiang, X.F. An, X.W. Yang, H. Wang, R.F. Wang, Cobalt-nickel phosphides@carbon spheres as highly efficient and stable electrocatalyst for hydrogen evolution reaction, *Catalysis Communications*, 124 (2019) 1-5.
